# Supplementary material for: Heteroatom-Induced Accelerated Kinetics on Nickel Selenide for Highly Efficient Hydrazine-Assisted Water Splitting and Zn-Hydrazine Battery
Source: Nanomicro Lett. 2023 Jun 19;15:155. doi: 10.1007/s40820-023-01128-z (PMC10279626; doi:10.1007/s40820-023-01128-z)
Supplement: Supplementary file 1 — Supplementary file1 (PDF 1917 kb) [file 40820_2023_1128_MOESM1_ESM.pdf]

Supporting Information for

## **Heteroatom-Induced Accelerated Kinetics on Nickel Selenide for Highly Efficient Hydrazine-Assisted Water Splitting and Zn- Hydrazine Battery**

Hao-Yu Wang<sup>1</sup>, Lei Wang<sup>1</sup>, Jin-Tao Ren<sup>1</sup>, Wen-Wen Tian<sup>1</sup>, Ming-Lei Sun<sup>1</sup> and  
Zhong-Yong Yuan<sup>1, 2, \*</sup>

<sup>1</sup> School of Materials Science and Engineering, Smart Sensing Interdisciplinary  
Science Center, Nankai University, Tianjin 300350, P. R. China

<sup>2</sup> Key Laboratory of Advanced Energy Materials Chemistry (Ministry of Education),  
Nankai University, Tianjin 300071, P. R. China

\*Corresponding author. E-mail: [zyyuan@nankai.edu.cn](mailto:zyyuan@nankai.edu.cn) (Zhong-Yong Yuan)

### **S1 Experimental Section**

#### **S1.1 Materials**

Nickel foam (99%) used in the study was obtained from Shanxi Lizhiyuan Technology Co., Ltd. Hydrochloric acid (HCl, 36.0%~38.0%) was obtained from Yongfei Chemical Reagent Co., Ltd. Sodium hypophosphite (NaH<sub>2</sub>PO<sub>2</sub>·H<sub>2</sub>O, 99.0%) and acetone (99.5%) were received from Tianjin Chemical Reagent Supply and Marketing Co., Ltd. Ethyl Alcohol (99.7%) was purchased from Concord Technology Co., Ltd. Deionized water was purchased from Tianjin Huaxun Medical Technology Co., Ltd. Ammonium chloride (NH<sub>4</sub>Cl, 99.5%), sodium chloride (NaCl, 99.5%) and potassium hydroxide (KOH, 85%) were purchased from Tianjin Bohua Chemical Reagent Co., Ltd. Nickel chloride hexahydrate (NiCl<sub>2</sub>·6H<sub>2</sub>O, 98.0%) was received from Tianjin Chemical Reagent wholesale Co., Ltd. Powder selenium (Se 99.5%) was purchased from Beijing Chaoyang Zhonglian Chemical Reagent Factory. 20 wt% Pt/C powders were purchased from Shanghai Hesun Electric Co., Ltd. Nickel nitrate (Ni(NO<sub>3</sub>)<sub>2</sub>·6H<sub>2</sub>O, 98%) and hydrazine hydrate (N<sub>2</sub>H<sub>4</sub>·H<sub>2</sub>O, 80%) was purchased from Tianjin Damao Chemical Reagent Co., Ltd.

#### **S1.2 Electrochemical Measurements**

For the preparation of Pt/C on NF control electrode, 5 mg of commercial Pt/C electrocatalyst (20 wt %) was dispersed into 480 μL deionized water/isopropanol (1:4) and 20 μL of Nafion solution (5 wt%) with sonication to obtain homogeneous catalyst ink. Then, 50 μL of catalyst ink was transferred onto one piece of Ni foam with the Pt loading mass of 200 μg cm<sup>-2</sup>.

To fairly compare the performance of various catalysts, all the polarization curves

were corrected for ohmic losses throughout the system, which include the wiring, substrate, catalyst material, and solution resistances. All these resistances constitute the series resistance ( $R_s$ ) of the measurement. The  $R_s$  can be obtained from an EIS Nyquist plot as the first intercept of the main arc (corresponding to the electrode-electrolyte interface) with the real axis. For all measurements, the values of  $R_s$  are low and consistent. Then the  $iR$ -corrected data is given by  $E_{\text{Corrected}} = E_{\text{Raw}} - iR_s$ .

The Tafel slope was calculated according to the Tafel equation of  $\eta = b \cdot \log(J/J_0)$ , where  $\eta$ ,  $b$ ,  $J$  and  $J_0$  indicate the overpotential, Tafel slope, current density, and exchange current density, respectively.

The electrochemical double layer capacitance ( $C_{\text{dl}}$ ) was determined by the cyclic voltammograms under the scan rate from 10 to 30  $\text{mV s}^{-1}$  in a narrow non-Faradaic potential range. The double layer capacitance  $C_{\text{dl}}$  is determined from CV measurements based on the equation  $C_{\text{dl}} = (j_a - j_c)/(2 \cdot \nu) = (j_a + |j_c|)/(2 \cdot \nu) = \Delta j/(2 \cdot \nu)$ , in which  $j_a$  and  $j_c$  are the anodic and cathodic current density, respectively, recorded at the middle of the selected potential range, and  $\nu$  is the scan rate. The  $C_{\text{dl}}$  can be further converted into electrochemical active surface area (ECSA) using roughness factor ( $r_f$ ):

$$r_f = C_{\text{dl}} (\text{mF cm}^{-2}) / C_{\text{dl,ideal}} (\text{mF cm}^{-2})$$

$$j_{\text{ECSA}} = j / r_f$$

where  $C_{\text{dl,ideal}}$  is the double layer capacitance of an ideally flat electrode (specific  $C_{\text{dl}}$ ), which is usually taken as  $C_{\text{dl,ideal}} = 0.04 \text{ mF cm}^{-2}$  for alkaline media.  $j_{\text{ECSA}}$  is the current density normalized by ECSA.

The electrochemical impedance spectroscopy (EIS) tests were performed at different potentials in the frequency range from 0.01 to 100000 Hz with the amplitude of 5 mV.

The TOF values are calculated via the following equation:

$$\text{TOF} = \frac{|j|A}{mFN}$$

where  $|j|$  is the current density at a fixed voltage during the LSV measurement in 1.0 M solution,  $A$  stands for the area of the electrode ( $0.5 \text{ cm}^2$ ) and  $F$  is the Faradic constant ( $96485 \text{ C mol}^{-1}$ ).  $N$  represents the quantity of active sites, which is calculated by measuring CV curves at  $0.05 \text{ V s}^{-1}$ . A factor of  $1/m$  is introduced, taking into account that  $m$  electrons are consumed to form one  $\text{H}_2$  molecule from water.

The pre-exponential factor ( $A_{\text{app}}$ ) and apparent activation energy ( $E_{\text{app}}$ ) at fixed overpotentials can be calculated based on Arrhenius equation [S1]:

$$i_{\text{ECSA}} = A_{\text{app}} \exp(E_{\text{app}}/RT)$$

Herein,  $i_{\text{ECSA}}$  presents the ECSA normalized current density,  $R$  is the ideal gas constant ( $8.314 \text{ J K}^{-1} \text{ mol}^{-1}$ ) and  $T$  stands for the Kelvin temperature (K). Therefore,  $E_{\text{app}}$  values at different applied potentials can be obtained by using the following equation [S2]:

$$|\partial(\log_{10}i_{\text{ECSA}})/\partial(1/T)| = -E_{\text{app}}/2.303R$$

Faradaic efficiency was calculated by comparing the volume of experimentally quantified gas (water-gas displacing method at a current density of 200 mA cm<sup>-2</sup>) with theoretically calculated gas,  $\eta_{\text{Faradaic efficiency}} = (V_{\text{experimental}}/V_{\text{theoretical}}) \times 100\%$ ; the theoretical volume of evolving gases can be calculated using the equation:  $V_{\text{theoretical}} = (I \times t \times V_m)/(n \times F)$ , where  $I$  is the current measured in the experiment,  $t$  is the recorded time,  $V_m$  is the molar volume of H<sub>2</sub> or O<sub>2</sub> in l/mol,  $n$  is the number of electrons needed for 1 mol H<sub>2</sub> or O<sub>2</sub>, and  $F$  is the Faraday's constant (96,485 C/mol).

### 1.3 Density Functional Theory Calculations

Density functional theory (DFT) based first-principles calculations are performed using the projected augmented wave (PAW) [S3] method implemented in the Vienna ab initio simulation package (VASP) [S4, S5]. The Kohn-Sham one-electron states are expanded using the plane-wave basis set with a kinetic energy cutoff of 500 eV. The Perdew-Burke-Ernzerhof (PBE) exchange-correlation functional within the generalized gradient approximation (GGA) is employed [S6]. To study the mechanistic details of surface reactions, the NiSe<sub>2</sub> (210) surface is modeled by a periodic slab repeated in 1×2 surface unit cell. P-doping is simulated by substituting Se with P. Fe-doping is simulated by substituting Ni with Fe. The Brillouin-zone (BZ) integration is carried out using the Monkhorst-Pack sampling method with a density of 2×2×1 for the geometry optimizations [S7]. A sufficiently large vacuum region of 15 Å was used for all the systems to ensure the periodic images to be well separated. During the geometry optimizations, all the atoms were allowed to relax until the maximum magnitude of the force acting on the atoms is smaller than 0.03 eV/Å, and the total energy convergence criterion is set to  $1 \times 10^{-4}$  eV. The calculation of the Gibbs free energy of the intermediates followed the Nørskov method [S8].

The oxidation of hydrazine into nitrogen and hydrogen occurs in the following six consecutive elementary steps:

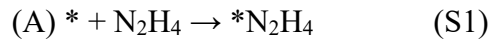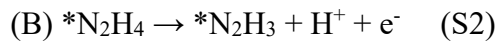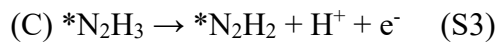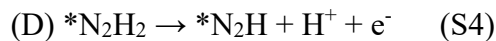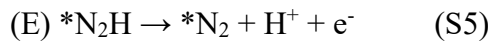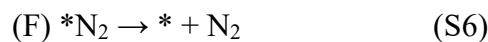

The asterisk (\*) represents the reaction surfaces. “\*N<sub>2</sub>H<sub>4</sub>”, “N<sub>2</sub>H<sub>3</sub>”, “N<sub>2</sub>H<sub>2</sub>”, “N<sub>2</sub>H”, and “\*N<sub>2</sub>” denote the models with the corresponding chemisorbed species residing in the reaction surfaces. Among these six elementary steps, steps (A) and (F) are the adsorption of N<sub>2</sub>H<sub>4</sub> and desorption of N<sub>2</sub>, respectively. The other four elementary steps involve the generation of one proton and one electron. Then, using the computational hydrogen electrode (pH = 0, p = 1 atm, T = 298 K), the Gibbs free energy of H<sup>+</sup> + e<sup>-</sup>

was replaced implicitly with the Gibbs free energy of one-half an H<sub>2</sub> molecule. Thus the reaction Gibbs free energies can be calculated with Eqs:

$$\Delta G_A = \Delta G_{N_2H_4} - \Delta G^* - \Delta G_{N_2H_4} \quad (S7)$$

$$\Delta G_B = \Delta G_{N_2H_3} + 0.5 \Delta G_{H_2} - \Delta G_{N_2H_4} - eU - kT \ln 10^{*pH} \quad (S8)$$

$$\Delta G_C = \Delta G_{N_2H_2} + 0.5 \Delta G_{H_2} - \Delta G_{N_2H_3} - eU - kT \ln 10^{*pH} \quad (S9)$$

$$\Delta G_D = \Delta G_{N_2H} + 0.5 \Delta G_{H_2} - \Delta G_{N_2H_2} - eU - kT \ln 10^{*pH} \quad (S10)$$

$$\Delta G_E = \Delta G_{N_2} + 0.5 \Delta G_{H_2} - \Delta G_{N_2H} - eU - kT \ln 10^{*pH} \quad (S11)$$

$$\Delta G_F = \Delta G^* + G_{N_2} - \Delta G_{N_2} \quad (S12)$$

U and the pH value in this work is set to zero. The adsorption or reaction Gibbs free energy is defined as  $\Delta G = \Delta E + (ZPE - T\Delta S)$ , where  $\Delta E$  is the adsorption or reaction energy based on DFT calculations,  $\Delta ZPE$  is the zero-point energy (ZPE) correction, T is the temperature, and  $\Delta S$  is the entropy change. For each system, its ZPE can be calculated by summing vibrational frequencies overall normal modes  $\nu$  ( $ZPE = 1/2 \sum \hbar \nu$ ). The entropies of gas-phase H<sub>2</sub>, N<sub>2</sub>, and NH<sub>2</sub>NH<sub>2</sub> are obtained from the NIST database<sup>3</sup> with the standard condition, and the adsorbed species were only taken vibrational entropy ( $S_v$ ) into account, as shown in the following formula:

$$S_v = \sum_i R \{ \hbar \nu_i / [k_B T \exp(\hbar \nu_i / k_B T) - k_B T] - \ln[1 - \exp(-\hbar \nu_i / k_B T)] \} \quad (S13)$$

Among which  $R = 8.314 \text{ J} \cdot \text{mol}^{-1} \cdot \text{K}^{-1}$ ,  $T = 298.15 \text{ K}$ ,  $h = 6.63 \times 10^{-34} \text{ J} \cdot \text{s}$ ,  $k_B = 1.38 \times 10^{-23} \text{ J} \cdot \text{K}^{-1}$ ,  $i$  is the frequency number,  $\nu_i$  is the vibrational frequency (unit is  $\text{cm}^{-1}$ ).

Under the standard condition, the overall HER pathway includes two steps: first, adsorption of hydrogen on the catalytic site (\*) from the initial state ( $H^+ + e^- + *$ ), second, release the product hydrogen ( $1/2 H_2$ ). The total energies of  $H^+ + e^-$  and  $1/2 H_2$  are equal. Therefore, the Gibbs free energy of the adsorption of the intermediate hydrogen on a catalyst ( $\Delta G_H$ ) is the key descriptor of the HER activity of the catalyst and is obtained by:

$$\Delta G_H = \Delta E_H + \Delta ZPE - T\Delta S$$

where  $\Delta E_H$ ,  $\Delta ZPE$  and  $\Delta S$  are the adsorption energy, zero-point energy change and entropy change of H adsorption, respectively.

The kinetic energy barrier of the initial water dissociation step ( $\Delta G_{H_2O}$ ) is applied as an activity descriptor for HER under alkaline condition, which can be calculated as follows:

$$\Delta G_{H_2O} = G_{ts} - G_{ini}$$

where  $G_{ts}$  and  $G_{ini}$  are the free energy of the transient state and the initial state for water dissociation, respectively.

## S2 Supplementary Figures and Tables

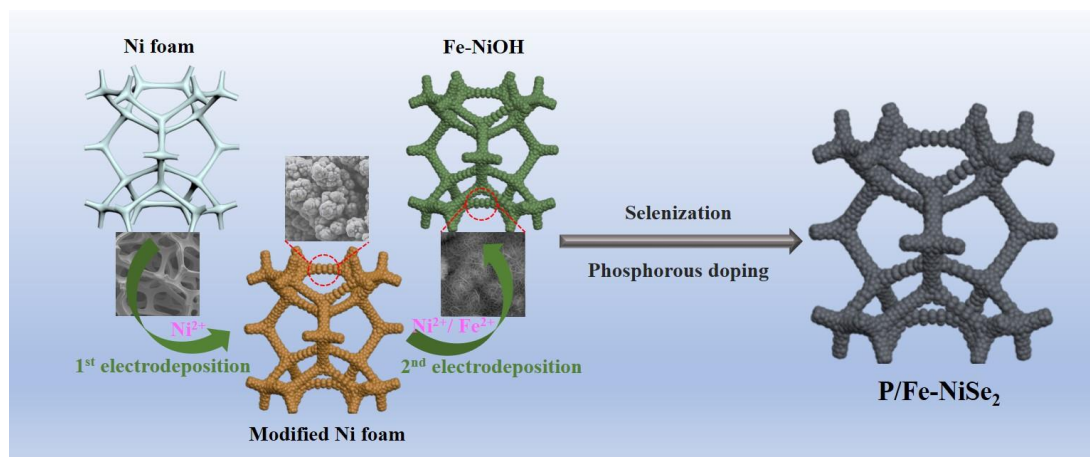**Scheme S1** Schematic illustration of the preparation of P/Fe-NiSe<sub>2</sub>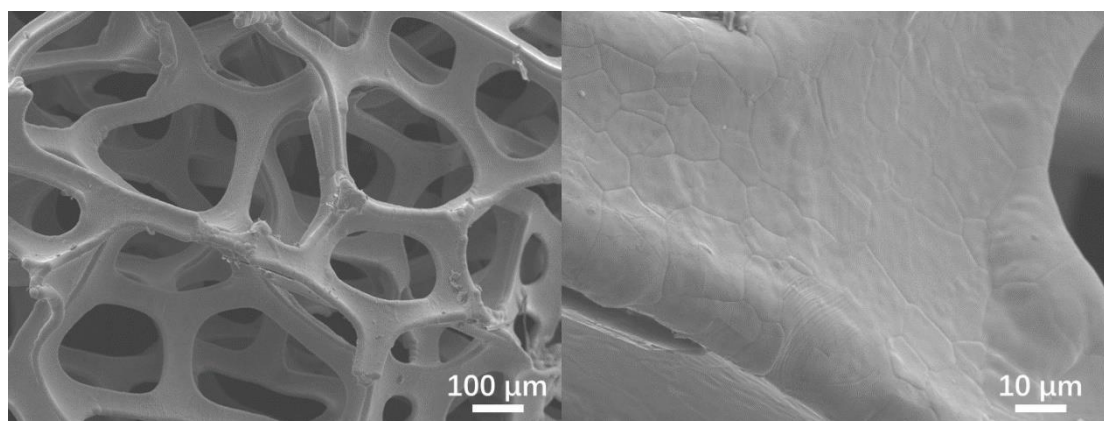**Fig. S1** SEM images of original Ni foam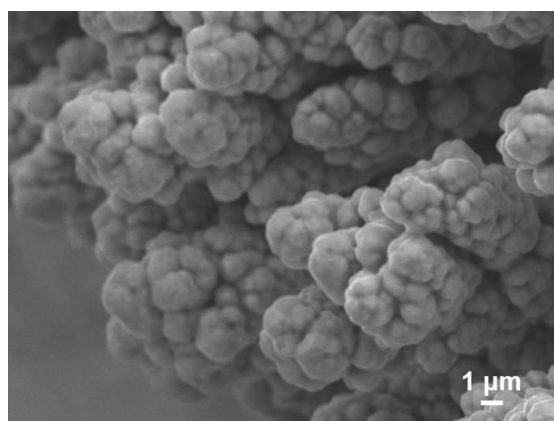**Fig. S2** High-magnification SEM image of Ni microsphere-modified Ni foam

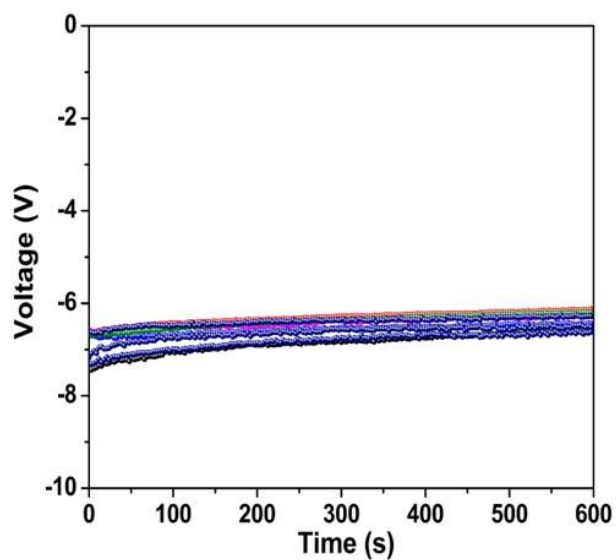

**Fig. S3** Current densities in 1<sup>st</sup> electrodeposition

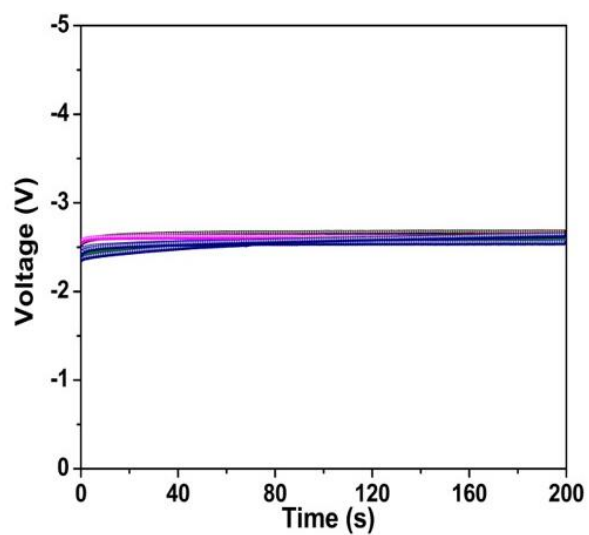

**Fig. S4** Current densities in 2<sup>nd</sup> electrodeposition

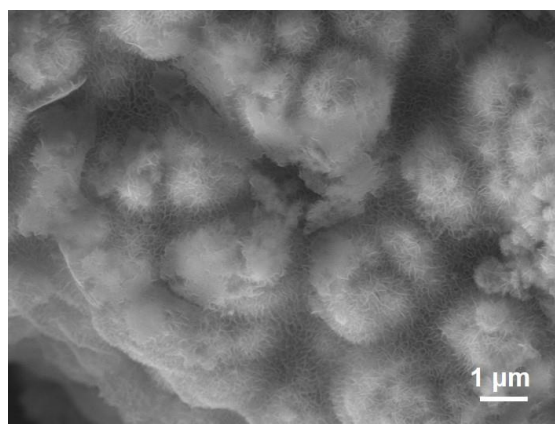

**Fig. S5** High-magnification SEM image of Fe-NiOH

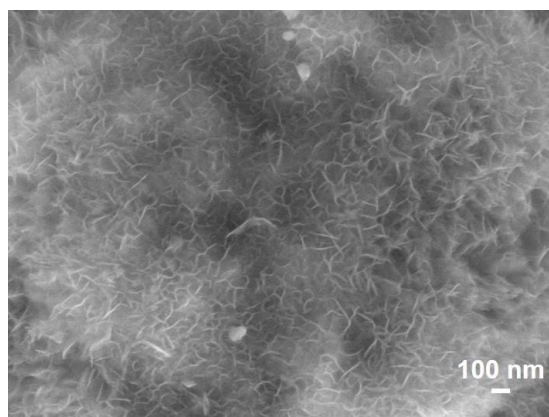

**Fig. S6** High-magnification SEM image of Fe-NiSe<sub>2</sub>

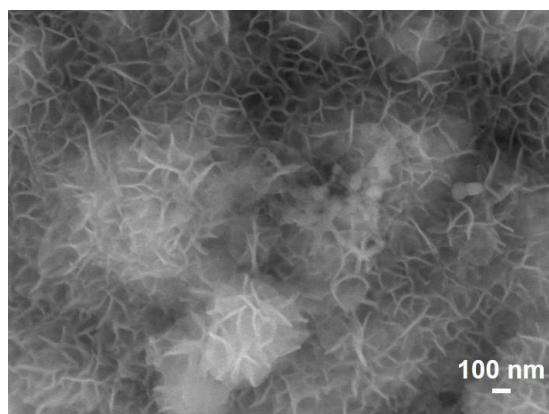

**Fig. S7** High-magnification SEM image of NiSe<sub>2</sub>

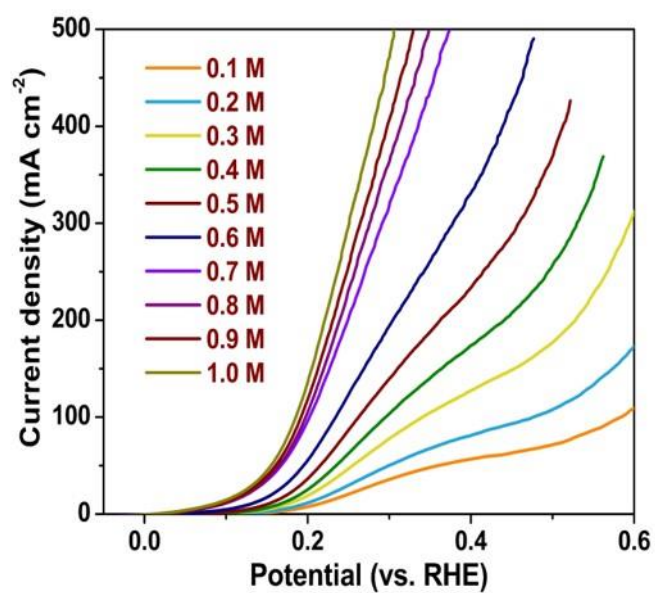

**Fig. S8** LSV curves of P/Fe-NiSe<sub>2</sub> for HzOR in 1.0 M KOH with different concentration of N<sub>2</sub>H<sub>4</sub>

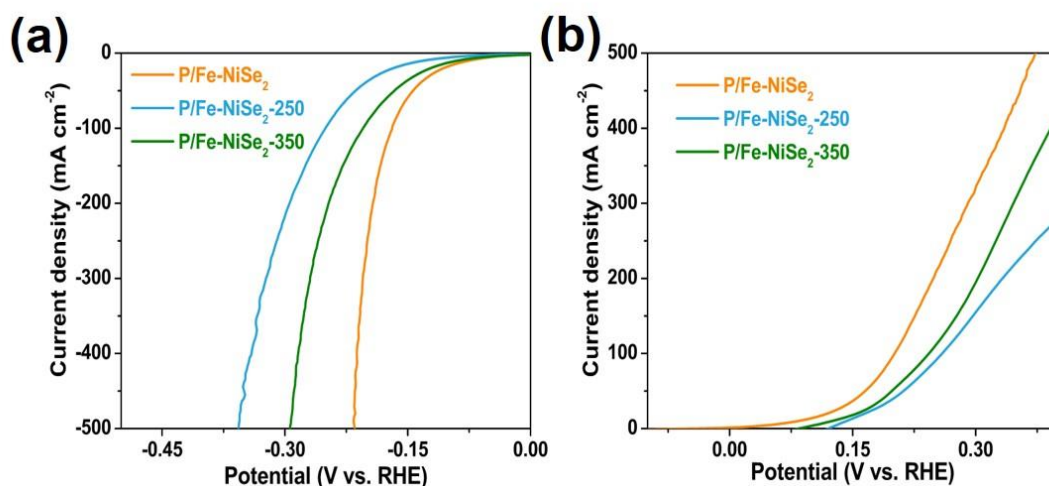

**Fig. S9** LSV curves of P/Fe-NiSe<sub>2</sub>, P/Fe-NiSe<sub>2</sub>-250 and P/Fe-NiSe<sub>2</sub>-350 for (a) HER and (b) HzOR

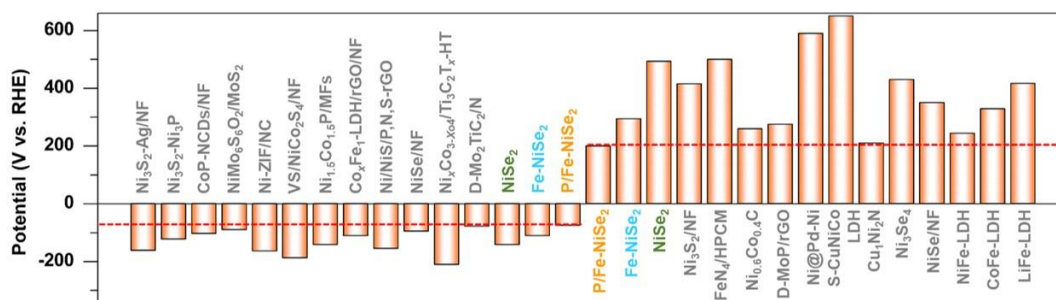

**Fig. S10** Comparison of potentials for HER (10 mA cm<sup>-2</sup>) and HzOR (100 mA cm<sup>-2</sup>) of the synthesized electrocatalysts and some recently reported electrocatalysts

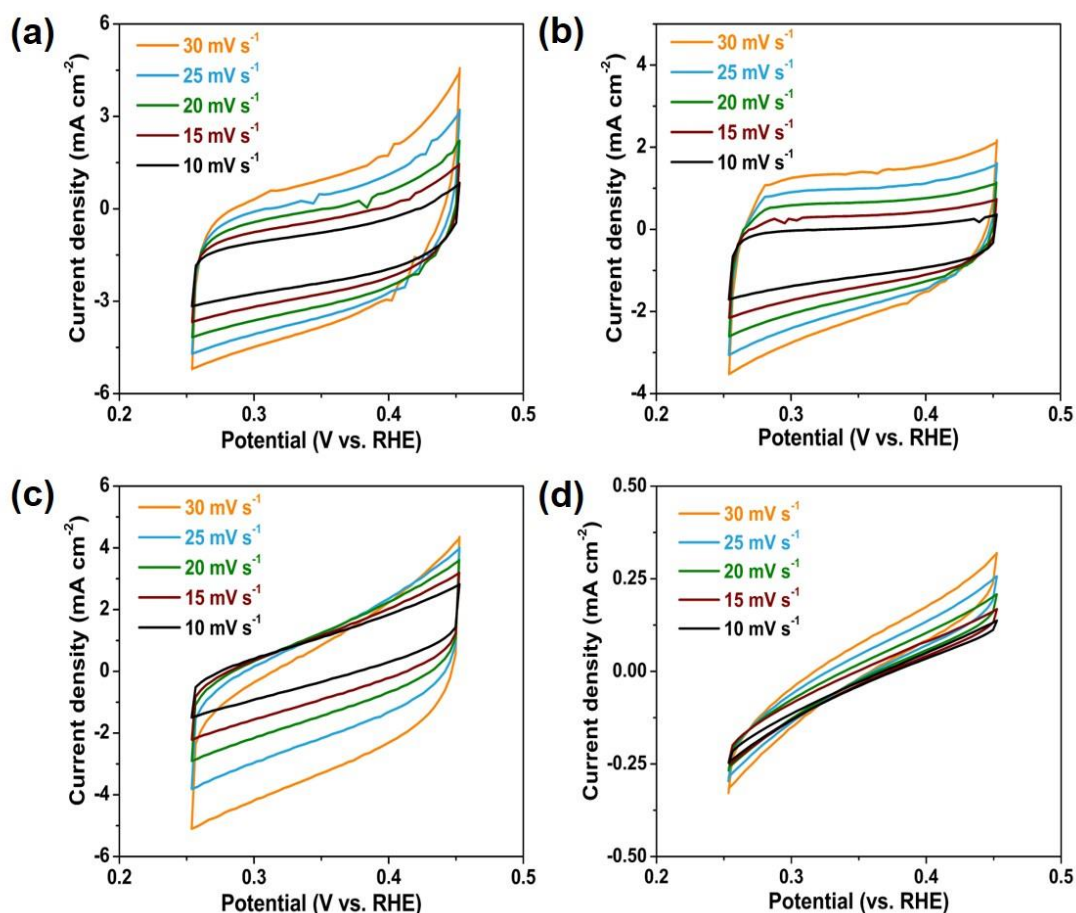

**Fig. S11** Cyclic voltammograms of (a) P/Fe-NiSe<sub>2</sub>, (b) Fe-NiSe<sub>2</sub>, (c) NiSe<sub>2</sub> and (d) NF with different scan rates from 10 to 30 mV s<sup>-1</sup>

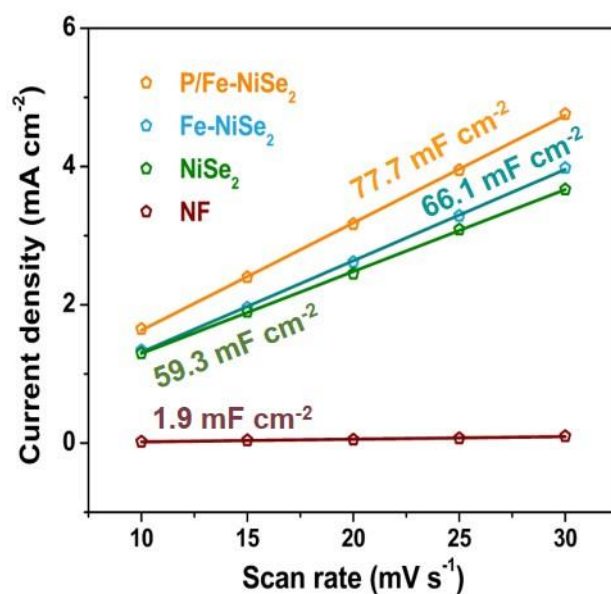

**Fig. S12** C<sub>dl</sub> conducted by plotting the current density difference against scan rate

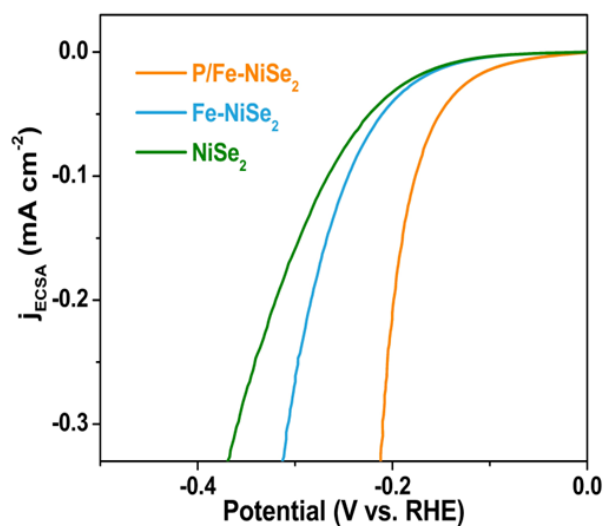

**Fig. S13** HER Polarization curves with current densities normalized to the ECSA

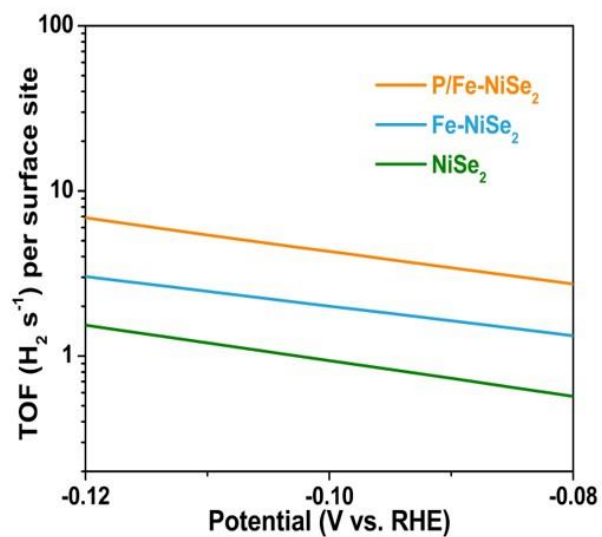

**Fig. S14** Calculated H<sub>2</sub> TOFs

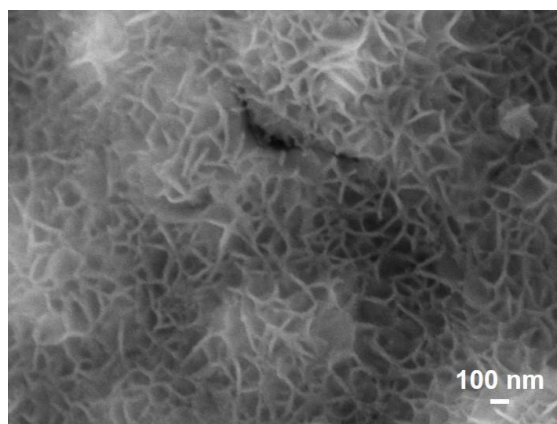

**Fig. S15** High-magnification SEM image of post-HER P/Fe-NiSe<sub>2</sub>  
S10/S23

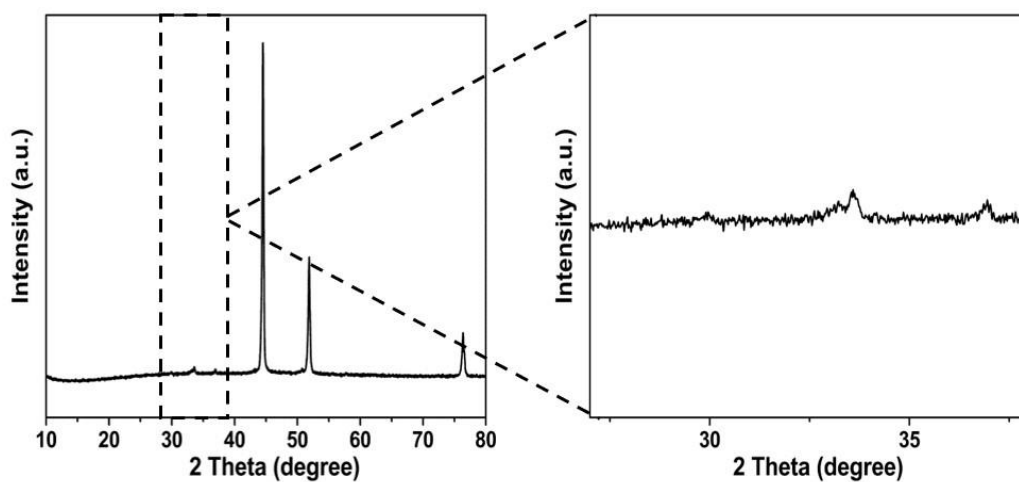

Fig. S16 XRD patterns of post-HER P/Fe-NiSe<sub>2</sub>

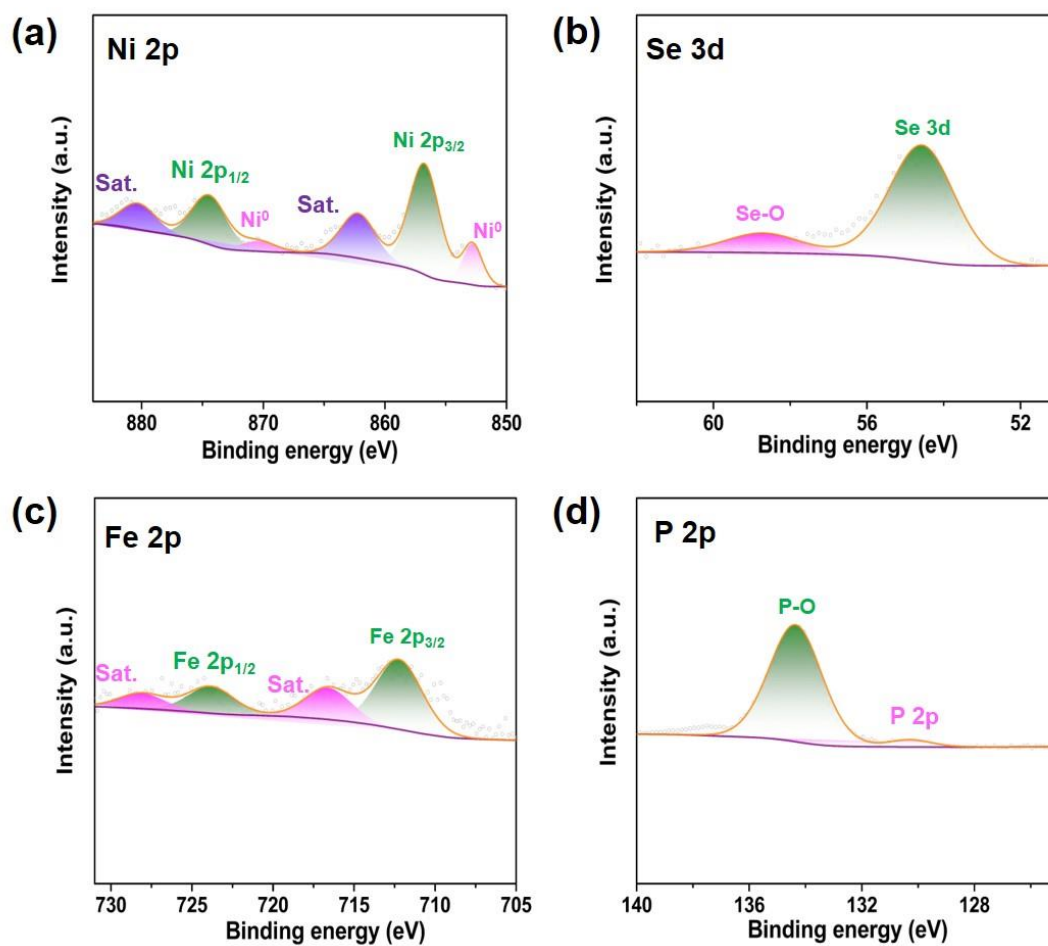

Fig. S17 XPS analysis of post-HER P/Fe-NiSe<sub>2</sub>

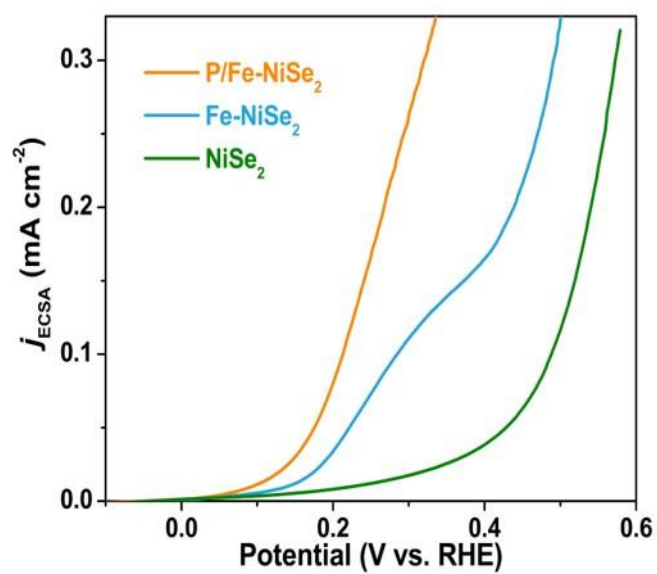

**Fig. S18** HzOR polarization curves with current densities normalized to the ECSA

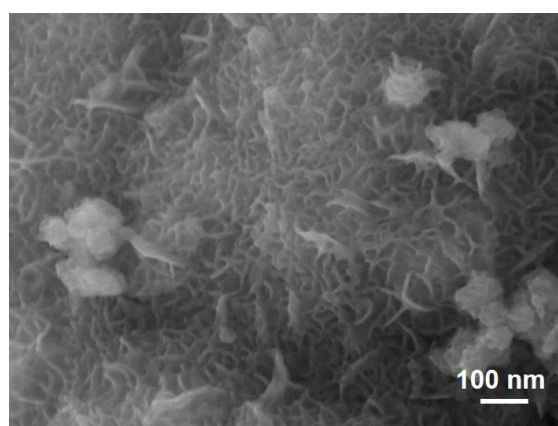

**Fig. S19** High-magnification SEM image of post-HzOR P/Fe-NiSe<sub>2</sub>

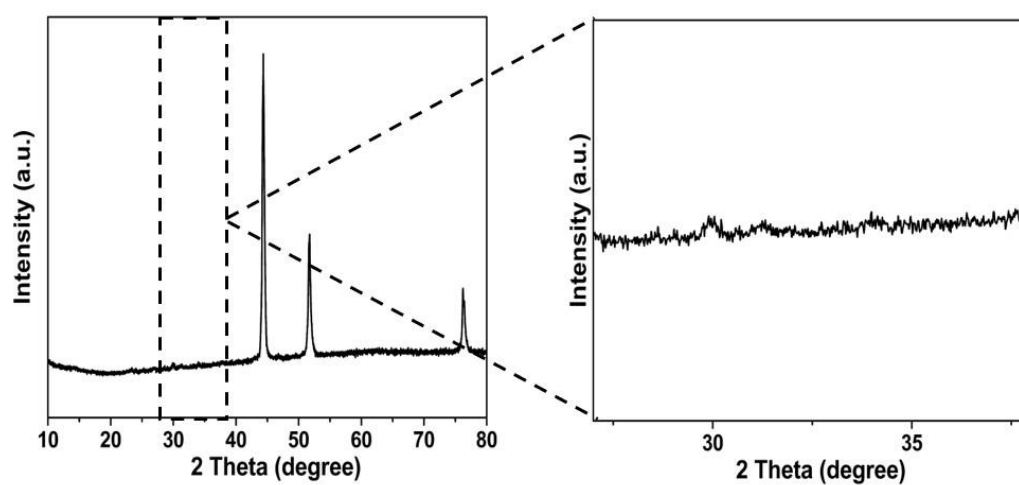

**Fig. S20** XRD patterns of post-HzOR P/Fe-NiSe<sub>2</sub>

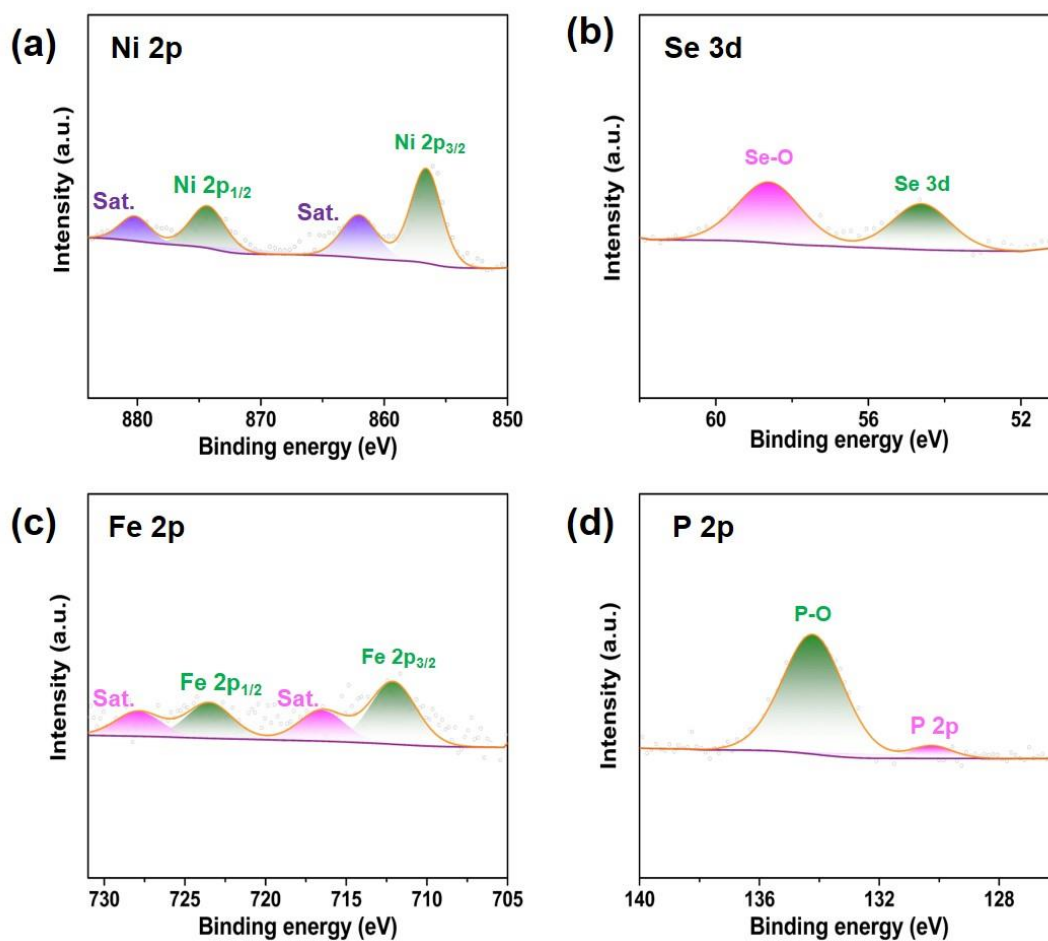

**Fig. S21** XPS analysis of post-HzOR P/Fe-NiSe<sub>2</sub>

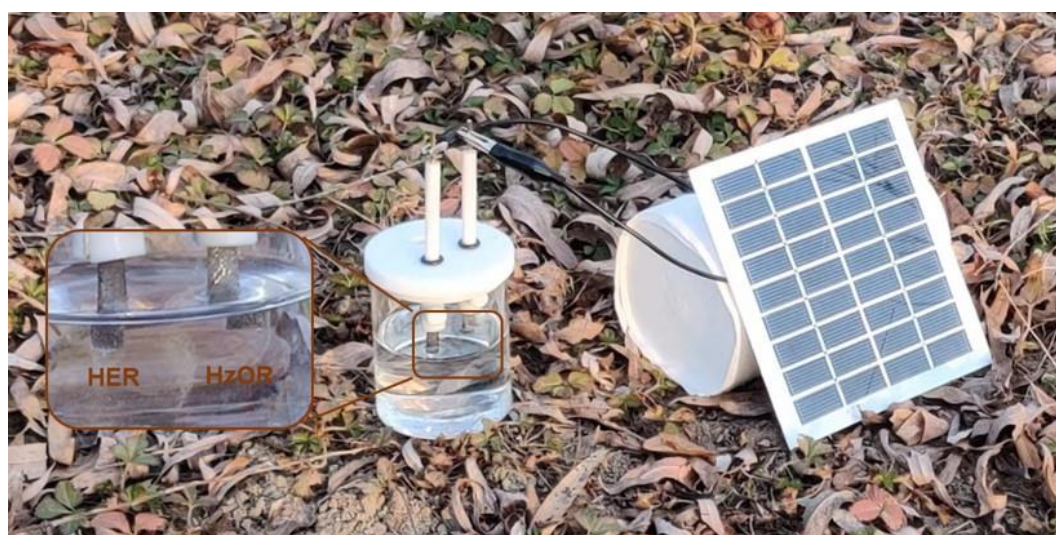

**Fig. S22** Photo graph of a commercial solar panel powered OHzS device under sunlight. Inset: enlarged image of the electrode surface

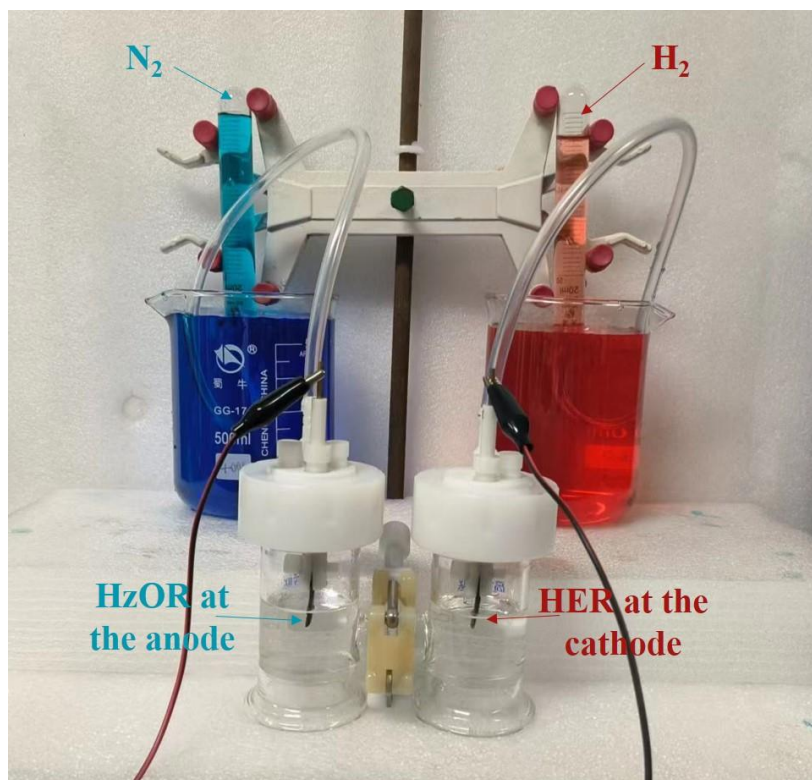

**Fig. S23** Photograph of the gas measuring device for P,Fe-NiSe<sub>2</sub> in hydrazine-assisted water electrolysis with the H<sub>2</sub>/N<sub>2</sub> ratio of about 2:1

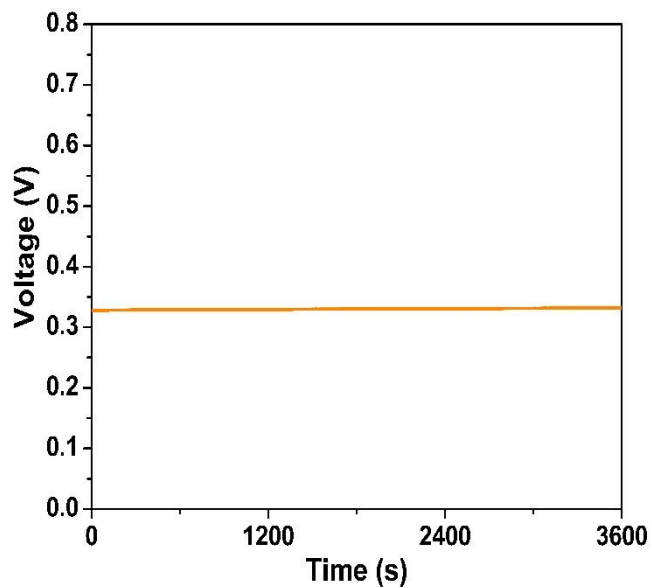

**Fig. S24** Open circuit voltage for P,Fe-NiSe<sub>2</sub>-assembly Zn-Hz battery

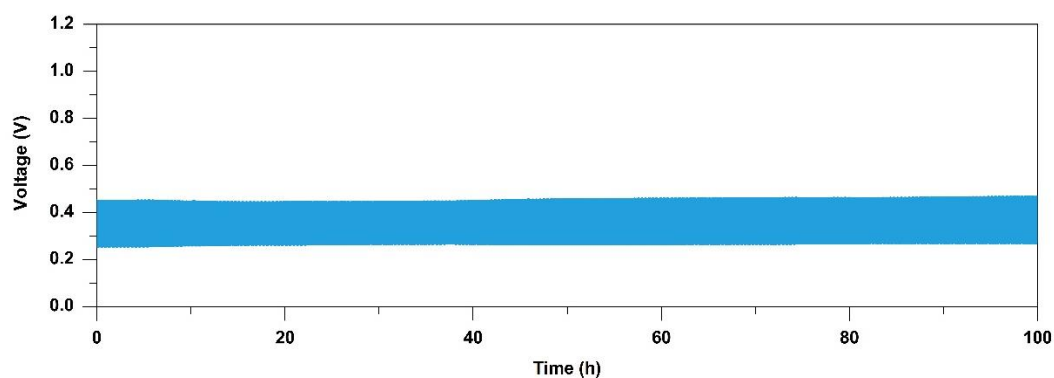

**Fig. S25** Galvanostatic discharge-charge cycling curves for the P/Fe-NiSe<sub>2</sub>-assembled Zn-Hz battery

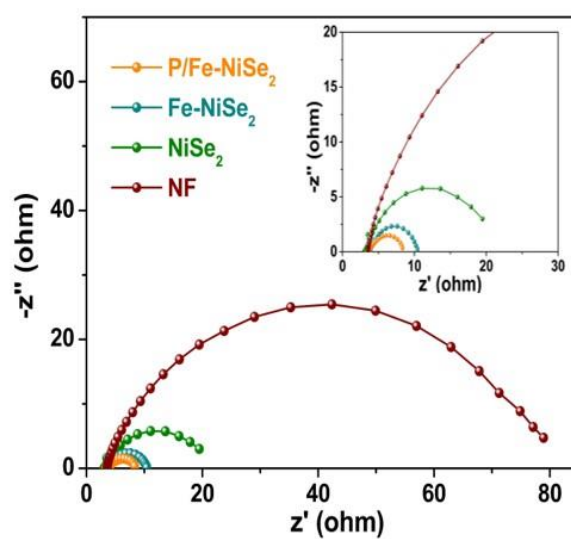

**Fig. S26** Nyquist plots of collected at -0.1 V (vs. RHE). Inset: the enlarged view

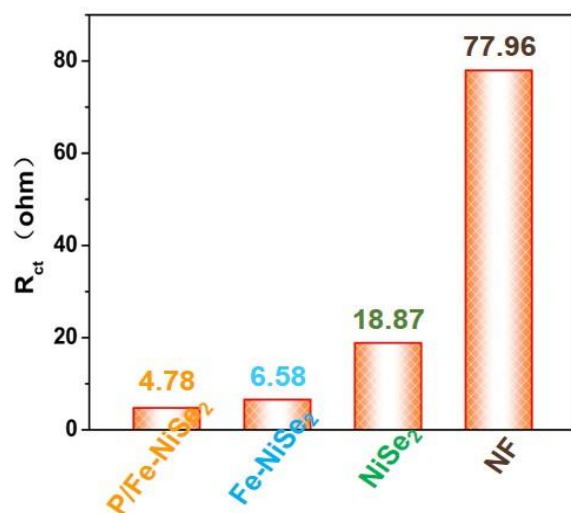

**Fig. S27**  $R_{ct}$  of P/Fe-NiSe<sub>2</sub>, Fe-NiSe<sub>2</sub>, NiSe<sub>2</sub> and NF

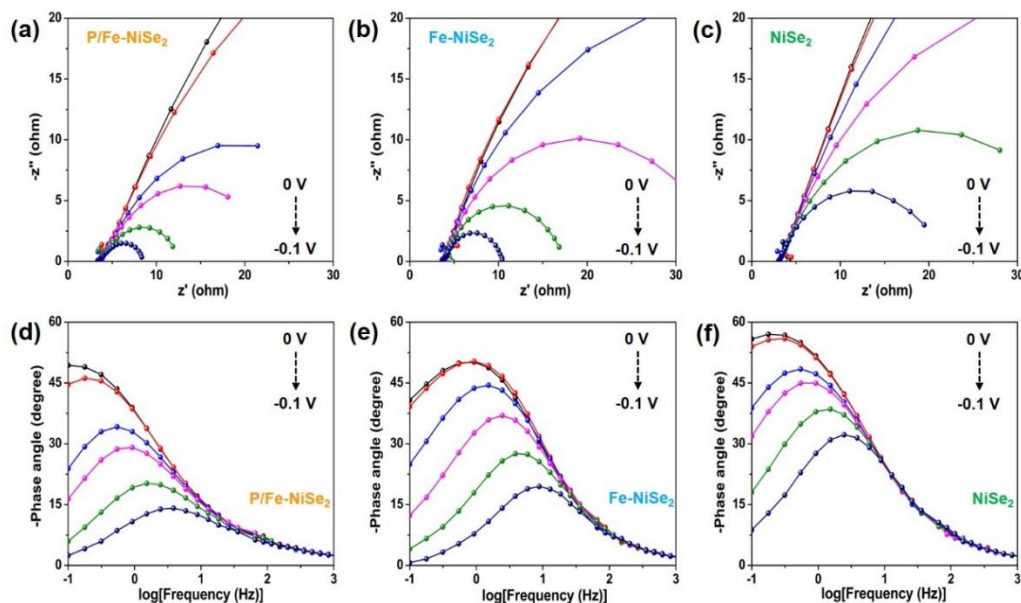

**Fig. S28** (a, b, c) Nyquist and (d, e, f) Bode phase plots of P/Fe-NiSe<sub>2</sub>, Fe-NiSe<sub>2</sub> and NiSe<sub>2</sub> at different potentials

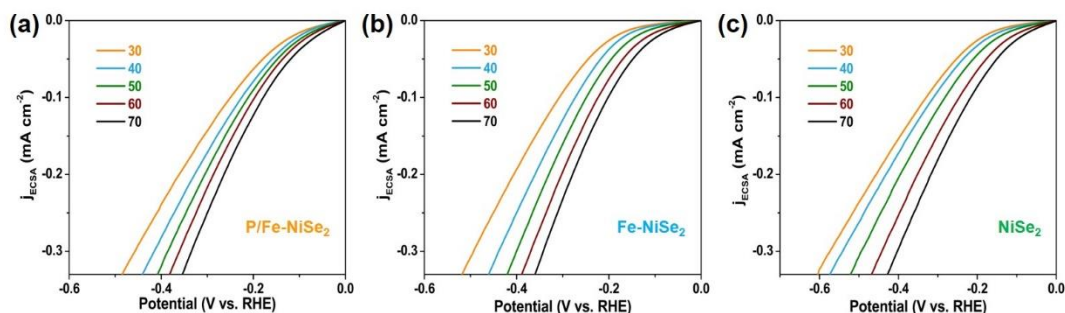

**Fig. S29** Polarization curves without iR-corrected in the temperature range from 30 to 70 °C

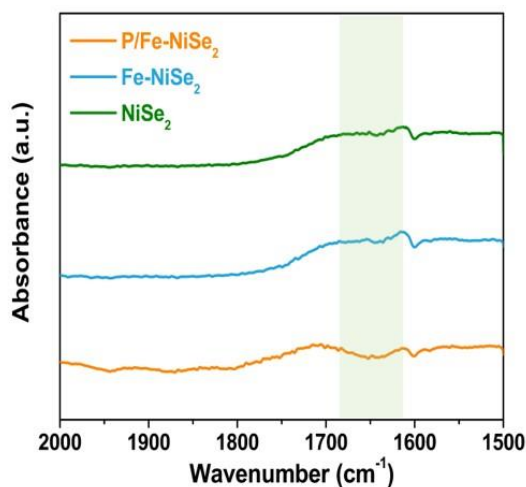

**Fig. S30** Electrochemical in-situ FTIR spectroscopy on different electrocatalysts measured on -0.1 V (vs. RHE)

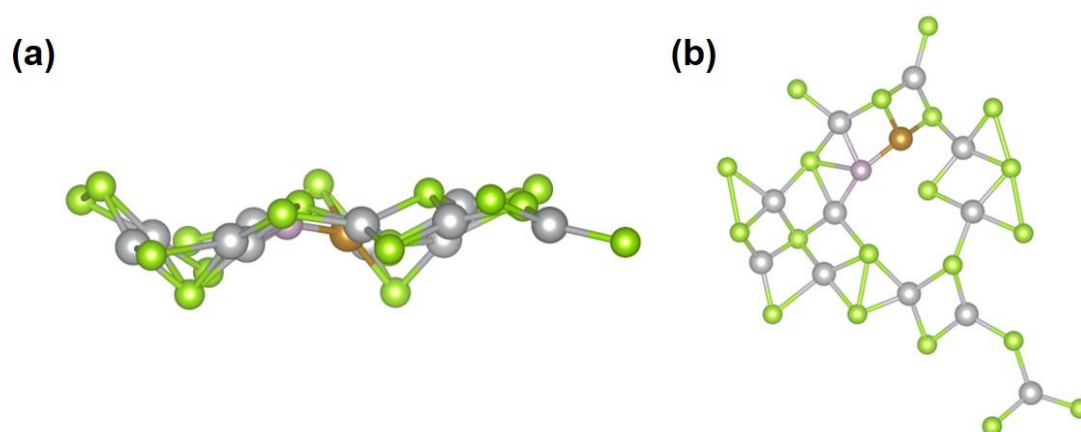

**Fig. S31** (a) Top- and (b) side- view of atomic structure models for P,Fe-NiSe<sub>2</sub>. The green, grey, brown and purple balls represent Se, Ni, Fe and P atoms, respectively

**Table S1** Comparison of HER performance of P/Fe-NiSe<sub>2</sub> with other electrocatalysts

| Catalyst                                                                                            | Electrolyte                          | Overpotential at 10 mA cm <sup>-2</sup> (mV) | References |
|-----------------------------------------------------------------------------------------------------|--------------------------------------|----------------------------------------------|------------|
| P/Fe-NiSe <sub>2</sub>                                                                              | 1.0 M KOH                            | 74                                           | This work  |
| Fe-NiSe <sub>2</sub>                                                                                | 1.0 M KOH                            | 110                                          | This work  |
| NiSe <sub>2</sub>                                                                                   | 1.0 M KOH                            | 141                                          | This work  |
| D-Mo <sub>2</sub> TiC <sub>2</sub> /N                                                               | -                                    | 78                                           | [S9]       |
| Ni <sub>x</sub> Co <sub>3-x</sub> O <sub>4</sub> /Ti <sub>3</sub> C <sub>2</sub> T <sub>x</sub> -HT | 1.0 M KOH                            | 210                                          | [S10]      |
| NiSe/NF                                                                                             | 1.0 M KOH                            | 95                                           | [S11]      |
| Ni/NiS/P,N,S-rGO                                                                                    | 1.0 M KOH                            | 155                                          | [S12]      |
| Co <sub>x</sub> Fe <sub>1-x</sub> LDH/rGO/NF                                                        | 1.0 M KOH                            | 110                                          | [S13]      |
| Ni <sub>1.5</sub> Co <sub>1.5</sub> P/MFs                                                           | 1.0 M KOH                            | 141                                          | [S14]      |
| VS/NiCo <sub>2</sub> S <sub>4</sub> /NF                                                             | 1.0 M KOH                            | 187                                          | [S15]      |
| Ni-ZIF/NC                                                                                           | 1.0 M KOH                            | 163                                          | [S16]      |
| Ni-ZIF/NC                                                                                           | 0.5 M H <sub>2</sub> SO <sub>4</sub> | 177                                          | [S16]      |
| NiMo <sub>6</sub> S <sub>6</sub> O <sub>2</sub> /MoS <sub>2</sub>                                   | 1.0 M NaOH                           | 90                                           | [S17]      |
| Fe-Co-O/Co@NC-mNS/NF                                                                                | 1.0 M KOH                            | 112                                          | [S18]      |
| CoP-NCDs/NF                                                                                         | 1.0 M KOH                            | 103                                          | [S19]      |
| Ni <sub>3</sub> S <sub>2</sub> -Ni <sub>3</sub> P                                                   | 1.0 M KOH + 0.5 M urea               | 122                                          | [S20]      |
| Ni <sub>3</sub> S <sub>2</sub> -Ag/NF                                                               | 1.0 M KOH                            | 161                                          | [S21]      |
| Ni-Co-B                                                                                             | 1.0 M KOH                            | 145                                          | [S22]      |
| Ni <sub>2</sub> P-Co <sub>2</sub> P                                                                 | 1.0 M KOH                            | 93                                           | [S23]      |
| Ni <sub>2</sub> P-Co <sub>2</sub> P                                                                 | 0.5 M H <sub>2</sub> SO <sub>4</sub> | 172                                          | [S23]      |
| Ni <sub>0.5</sub> @MoC <sub>x</sub> /NC                                                             | 0.5 M H <sub>2</sub> SO <sub>4</sub> | 100                                          | [S24]      |
| Ni-Mo <sub>2</sub> C@NPC                                                                            | 0.5 M H <sub>2</sub> SO <sub>4</sub> | 144                                          | [S25]      |
| Ni-Mo <sub>2</sub> C@NPC                                                                            | 1.0 M KOH                            | 183                                          | [S25]      |

**Table S2** Comparison of HzOR performance of P/Fe-NiSe<sub>2</sub> with other electrocatalysts

| Catalyst                               | Electrolyte                                      | Potential at 100 mA cm <sup>-2</sup> (mV vs. RHE) | References |
|----------------------------------------|--------------------------------------------------|---------------------------------------------------|------------|
| P/Fe-NiSe <sub>2</sub>                 | 1.0 M KOH + 0.7 M N <sub>2</sub> H <sub>4</sub>  | 200                                               | This work  |
| Fe-NiSe <sub>2</sub>                   | 1.0 M KOH + 0.7 M N <sub>2</sub> H <sub>4</sub>  | 294                                               | This work  |
| NiSe <sub>2</sub>                      | 1.0 M KOH + 0.7 M N <sub>2</sub> H <sub>4</sub>  | 493                                               | This work  |
| Ni <sub>3</sub> S <sub>2</sub> /NF     | 1.0 M KOH + 0.2 M N <sub>2</sub> H <sub>4</sub>  | 415                                               | [S26]      |
| FeN <sub>4</sub> /HPCM                 | 1.0 M KOH + 0.1 M N <sub>2</sub> H <sub>4</sub>  | 500                                               | [S27]      |
| Ni <sub>0.6</sub> Co <sub>0.4</sub> Se | 1.0 M KOH + 0.1 M N <sub>2</sub> H <sub>4</sub>  | 260                                               | [S28]      |
| D-MoP/rGO                              | 1.0 M KOH + 0.5 M N <sub>2</sub> H <sub>4</sub>  | 275                                               | [S29]      |
| Ni@Pd-Ni                               | 1.0 M KOH + 0.08 M N <sub>2</sub> H <sub>4</sub> | 590                                               | [S30]      |
| S-CuNiCo LDH                           | 1.0 M KOH + 0.02 M N <sub>2</sub> H <sub>4</sub> | 650                                               | [S31]      |
| Cu <sub>1</sub> Ni <sub>2</sub> -N     | 1.0 M KOH + 0.5 M N <sub>2</sub> H <sub>4</sub>  | 210                                               | [S32]      |
| Ni <sub>3</sub> Se <sub>4</sub>        | 1.0 M KOH + 0.5 M N <sub>2</sub> H <sub>4</sub>  | 430                                               | [S33]      |
| NiSe/NF                                | 1.0 M KOH + 0.5 M N <sub>2</sub> H <sub>4</sub>  | 350                                               | [S11]      |
| NiFe-LDH                               | 1.0 M KOH + 2.0 M N <sub>2</sub> H <sub>4</sub>  | 244                                               | [S34]      |
| CoFe-LDH                               | 1.0 M KOH + 2.0 M N <sub>2</sub> H <sub>4</sub>  | 329                                               | [S34]      |
| LiFe-LDH                               | 1.0 M KOH + 2.0 M N <sub>2</sub> H <sub>4</sub>  | 417                                               | [S34]      |

**Table S3** Comparison of overall hydrazine splitting performance of P/Fe-NiSe<sub>2</sub> with other electrocatalysts

| Catalyst                              | Electrolyte                                     | Voltage at 10 or 100 mA cm <sup>-2</sup> (mV) | References |
|---------------------------------------|-------------------------------------------------|-----------------------------------------------|------------|
| P/Fe-NiSe <sub>2</sub>                | 1.0 M KOH + 0.7 M N <sub>2</sub> H <sub>4</sub> | 91 (10)                                       | This work  |
| P/Fe-NiSe <sub>2</sub>                | 1.0 M KOH + 0.7 M N <sub>2</sub> H <sub>4</sub> | 445 (100)                                     | This work  |
| Ni <sub>3</sub> S <sub>2</sub> /NF    | 1.0 M KOH + 0.2 M N <sub>2</sub> H <sub>4</sub> | 867 (100)                                     | [S26]      |
| D-MoP/rGO                             | 1.0 M KOH + 0.5 M N <sub>2</sub> H <sub>4</sub> | 740 (100)                                     | [S29]      |
| Cu <sub>1</sub> Ni <sub>2</sub> -N    | 1.0 M KOH + 0.5 M N <sub>2</sub> H <sub>4</sub> | 240 (10)                                      | [S32]      |
| Pd <sub>1</sub> Co <sub>1</sub> -CNFs | 3.0 M KOH + 0.2 M N <sub>2</sub> H <sub>4</sub> | 440 (10)                                      | [S35]      |
| Ni(Cu)@NiFeP/NM                       | 1.0 M KOH + 0.5 M N <sub>2</sub> H <sub>4</sub> | 491 (100)                                     | [S36]      |
| NiSe/NF                               | 1.0 M KOH + 0.5 M N <sub>2</sub> H <sub>4</sub> | 310 (10)<br>550 (100)                         | [S11]      |
| NiOOH@CoCu CH                         | 1.0 M KOH + 0.5 M N <sub>2</sub> H <sub>4</sub> | 87 (10)<br>550 (100)                          | [S37]      |

**Table S4** Gibbs energies for HzOR intermediates

| Catalyst               | *N <sub>2</sub> H <sub>4</sub> | *N <sub>2</sub> H <sub>3</sub> | *N <sub>2</sub> H <sub>2</sub> | *N <sub>2</sub> H | *N <sub>2</sub> |
|------------------------|--------------------------------|--------------------------------|--------------------------------|-------------------|-----------------|
| P/Fe-NiSe <sub>2</sub> | -0.68                          | -0.75                          | -0.13                          | -0.17             | -0.94           |
| Fe-NiSe <sub>2</sub>   | -1.32                          | -1.93                          | -0.65                          | -0.76             | -1.63           |

**Supplementary References**

- [S1] Y. Duan, N. Dubouis, J. Huang, D.A. Dalla Corte, V. Pimenta, et al., Revealing the Impact of Electrolyte Composition for Co-Based Water Oxidation Catalysts by the Study of Reaction Kinetics Parameters, *ACS Catal.* **10**(7) 4160-4170 (2020). <https://doi.org/10.1021/acscatal.0c00490>
- [S2] J. Huang, H. Sheng, R.D. Ross, J. Han, X. Wang, et al., Modifying redox properties and local bonding of  $\text{Co}_3\text{O}_4$  by  $\text{CeO}_2$  enhances oxygen evolution catalysis in acid, *Nat. Commun.* **12**(1) 3036 (2021). <https://doi.org/10.1038/s41467-021-23390-8>
- [S3] G. Kresse, D. Joubert, From ultrasoft pseudopotentials to the projector augmented-wave method, *Phys. Rev. B* **59**(3) 1758-1775 (1999). <https://doi.org/10.1103/PhysRevB.59.1758>
- [S4] G. Kresse, J. Hafner, Ab initio molecular dynamics for liquid metals, *Phys. Rev. B* **47**(1) 558-561 (1993). <https://doi.org/10.1103/PhysRevB.47.558>
- [S5] G. Kresse, J. Furthmüller, Efficient iterative schemes for ab initio total-energy calculations using a plane-wave basis set, *Phys. Rev. B* **54**(16) 11169-11186 (1996). <https://doi.org/10.1103/PhysRevB.54.11169>
- [S6] J.P. Perdew, K. Burke, M. Ernzerhof, Generalized Gradient Approximation Made Simple, *Phys. Rev. Lett.* **77**(18) 3865-3868 (1996). <https://doi.org/10.1103/PhysRevLett.77.3865>
- [S7] H.J. Monkhorst, J.D. Pack, Special points for Brillouin-zone integrations, *Phys. Rev. B* **13**(12) 5188-5192 (1976). <https://doi.org/10.1103/PhysRevB.13.5188>
- [S8] J.K. Nørskov, J. Rossmeisl, A. Logadottir, L. Lindqvist, J.R. Kitchin, et al., Origin of the Overpotential for Oxygen Reduction at a Fuel-Cell Cathode, *J. Phys. Chem. B* **108**(46) 17886-17892 (2004). <https://doi.org/10.1021/jp047349j>
- [S9] Y. Zhu, G. Xu, W. Song, Y. Zhao, Z. He, et al., Anchoring single Ni atoms on defected 2D MXene nanosheets as an efficient electrocatalyst for enhanced hydrogen evolution reaction, *Ceram. Int.* **47**(21) 30005-30011 (2021). <https://doi.org/10.1016/j.ceramint.2021.07.175>
- [S10] P. Xu, H. Wang, J. Liu, X. Feng, W. Ji, et al., High-Performance  $\text{Ni}_x\text{Co}_{3-x}\text{O}_4/\text{Ti}_3\text{C}_2\text{T}_x$ -HT Interfacial Nanohybrid for Electrochemical Overall Water Splitting, *ACS Appl. Mater. Interfaces* **13**(29) 34308-34319 (2021). <https://doi.org/10.1021/acsami.1c08032>
- [S11] Y. Li, Y. Zhao, F.-M. Li, Z. Dang, P. Gao, Ultrathin NiSe Nanosheets on Ni Foam for Efficient and Durable Hydrazine-Assisted Electrolytic Hydrogen Production, *ACS Appl. Mater. Interfaces* **13**(29) 34457-34467 (2021).

<https://doi.org/10.1021/acsami.1c09503>

- [S12] M.B.Z. Hegazy, M.R. Berber, Y. Yamauchi, A. Pakdel, R. Cao, et al., Synergistic Electrocatalytic Hydrogen Evolution in Ni/NiS Nanoparticles Wrapped in Multi-Heteroatom-Doped Reduced Graphene Oxide Nanosheets, *ACS Appl. Mater. Interfaces* **13**(29) 34043-34052 (2021).  
<https://doi.org/10.1021/acsami.1c05888>
- [S13] J. Guo, Z. Wei, K. Wang, H. Zhang, Synergistic coupling of CoFe-layered double hydroxide nanosheet arrays with reduced graphene oxide modified Ni foam for highly efficient oxygen evolution reaction and hydrogen evolution reaction, *Int. J. Hydrogen Energy* **46**(54) 27529-27542 (2021).  
<https://doi.org/10.1016/j.ijhydene.2021.06.013>
- [S14] T. Chen, M. Qian, X. Tong, W. Liao, Y. Fu, et al., Nanosheet self-assembled NiCoP microflowers as efficient bifunctional catalysts (HER and OER) in alkaline medium, *Int. J. Hydrogen Energy* **46**(58) 29889-29895 (2021).  
<https://doi.org/10.1016/j.ijhydene.2021.06.121>
- [S15] Y. Han, S. Sun, J. Xu, X. Zhang, L. Wang, et al., Flocculent VS nanoparticle aggregate-modified NiCo<sub>2</sub>S<sub>4</sub> nanograss arrays for electrocatalytic water splitting, *Sustain. Energ. Fuels* **5**(15) 3858-3866 (2021).  
<https://doi.org/10.1039/D1SE00485A>
- [S16] Y. Zhang, S. Yun, M. Sun, X. Wang, L. Zhang, et al., Implanted metal-nitrogen active sites enhance the electrocatalytic activity of zeolitic imidazolate zinc framework-derived porous carbon for the hydrogen evolution reaction in acidic and alkaline media, *J. Colloid Interface Sci.* **604**(441-457 (2021).  
<https://doi.org/10.1016/j.jcis.2021.06.152>
- [S17] H. Cheng, Y. Diao, Q. Liu, L. Wei, X. Li, et al., Di-nuclear metal synergistic catalysis: Ni<sub>2</sub>Mo<sub>6</sub>S<sub>6</sub>O<sub>2</sub>/MoS<sub>2</sub> two-dimensional nanosheets for hydrogen evolution reaction, *Chem. Eng. J.* **428** 131084 (2022).  
<https://doi.org/10.1016/j.cej.2021.131084>
- [S18] T.I. Singh, G. Rajeshkhanna, U.N. Pan, T. Kshetri, H. Lin, et al., Alkaline Water Splitting Enhancement by MOF-Derived Fe–Co–Oxide/Co@NC-mNS Heterostructure: Boosting OER and HER through Defect Engineering and In Situ Oxidation, *Small* **17**(29) 2101312 (2021).  
<https://doi.org/10.1002/sml.202101312>
- [S19] H. Liu, Z. Liu, Y. Wang, J. Zhang, Z. Yang, et al., Carbon dots-oriented synthesis of fungus-like CoP microspheres as a bifunctional electrocatalyst for efficient overall water splitting, *Carbon* **182**(327-334 (2021).  
<https://doi.org/10.1016/j.carbon.2021.06.029>
- [S20] J. Liu, Y. Wang, Y. Liao, C. Wu, Y. Yan, et al., Heterostructured Ni<sub>3</sub>S<sub>2</sub>–Ni<sub>3</sub>P/NF as a Bifunctional Catalyst for Overall Urea–Water Electrolysis for Hydrogen Generation, *ACS Appl. Mater. Interfaces* **13**(23) 26948-26959

- (2021). <https://doi.org/10.1021/acsami.1c04325>
- [S21] H.-J. Liu, W.-L. Yu, M.-X. Li, S.-Y. Dou, F.-L. Wang, et al., The rational design of Ni<sub>3</sub>S<sub>2</sub> nanosheets–Ag nanorods on Ni foam with improved hydrogen adsorption sites for the hydrogen evolution reaction, *Sustain. Energ. Fuels* **5**(13) 3428-3435 (2021). <https://doi.org/10.1039/D1SE00702E>
- [S22] A. Jokar, A. Toghræi, M. Maleki, G. Barati Darband, Facile electrochemical synthesis of Ni-Co-B film on Cu sheet for dual-electrocatalysis of hydrogen and oxygen evolution reactions, *Electrochim. Acta* **389** 138691 (2021). <https://doi.org/10.1016/j.electacta.2021.138691>
- [S23] Q. Cao, S. Hao, Y. Wu, K. Pei, W. You, et al., Interfacial charge redistribution in interconnected network of Ni<sub>2</sub>P–Co<sub>2</sub>P boosting electrocatalytic hydrogen evolution in both acidic and alkaline conditions, *Chem. Eng. J.* **424** 130444 (2021). <https://doi.org/10.1016/j.cej.2021.130444>
- [S24] C. Liu, L. Sun, L. Luo, W. Wang, H. Dong, et al., Integration of Ni Doping and a Mo<sub>2</sub>C/MoC Heterojunction for Hydrogen Evolution in Acidic and Alkaline Conditions, *ACS Appl. Mater. Interfaces* **13**(19) 22646-22654 (2021). <https://doi.org/10.1021/acsami.1c04989>
- [S25] Y. Lu, C. Yue, Y. Li, W. Bao, X. Guo, et al., Atomically dispersed Ni on Mo<sub>2</sub>C embedded in N, P co-doped carbon derived from polyoxometalate supramolecule for high-efficiency hydrogen evolution electrocatalysis, *Appl. Catal. B-Environ.* **296** 120336 (2021). <https://doi.org/10.1016/j.apcatb.2021.120336>
- [S26] G. Liu, Z. Sun, X. Zhang, H. Wang, G. Wang, et al., Vapor-phase hydrothermal transformation of a nanosheet array structure Ni(OH)<sub>2</sub> into ultrathin Ni<sub>3</sub>S<sub>2</sub> nanosheets on nickel foam for high-efficiency overall water splitting, *J. Mater. Chem. A* **6**(39) 19201-19209 (2018). <https://doi.org/10.1039/C8TA07162D>
- [S27] Y.-C. Wang, L.-Y. Wan, P.-X. Cui, L. Tong, Y.-Q. Ke, et al., Porous Carbon Membrane-Supported Atomically Dispersed Pyrrole-Type Fe-N<sub>4</sub> as Active Sites for Electrochemical Hydrazine Oxidation Reaction, *Small* **16**(31) 2002203 (2020). <https://doi.org/10.1002/sml.202002203>
- [S28] Z. Feng, E. Wang, S. Huang, J. Liu, A bifunctional nanoporous Ni–Co–Se electrocatalyst with a superaerophobic surface for water and hydrazine oxidation, *Nanoscale* **12**(7) 4426-4434 (2020). <https://doi.org/10.1039/C9NR09959J>
- [S29] Y. Gao, Q. Wang, T. He, J.-Y. Zhang, H. Sun, et al., Defective crystalline molybdenum phosphides as bifunctional catalysts for hydrogen evolution and hydrazine oxidation reactions during water splitting, *Inorg. Chem. Front.* **6**(10) 2686-2695 (2019). <https://doi.org/10.1039/C9QI01005J>
- [S30] M. Du, H. Sun, J. Li, X. Ye, F. Yue, et al., Integrative Ni@Pd-Ni Alloy

Nanowire Array Electrocatalysts Boost Hydrazine Oxidation Kinetics, *ChemElectroChem* **6**(22) 5581-5587 (2019).

<https://doi.org/10.1002/celec.201901303>

- [S31] W. Liu, J. Xie, Y. Guo, S. Lou, L. Gao, et al., Sulfurization-induced edge amorphization in copper–nickel–cobalt layered double hydroxide nanosheets promoting hydrazine electro-oxidation, *J. Mater. Chem. A* **7**(42) 24437-24444 (2019). <https://doi.org/10.1039/C9TA07857F>
- [S32] Z. Wang, L. Xu, F. Huang, L. Qu, J. Li, et al., Copper–Nickel Nitride Nanosheets as Efficient Bifunctional Catalysts for Hydrazine-Assisted Electrolytic Hydrogen Production, *Adv. Energy Mater.* **9**(21) 1900390 (2019). <https://doi.org/10.1002/aenm.201900390>
- [S33] J.-Y. Zhang, X. Tian, T. He, S. Zaman, M. Miao, et al., In situ formation of Ni<sub>3</sub>Se<sub>4</sub> nanorod arrays as versatile electrocatalysts for electrochemical oxidation reactions in hybrid water electrolysis, *J. Mater. Chem. A* **6**(32) 15653-15658 (2018). <https://doi.org/10.1039/C8TA06361C>
- [S34] Z. Li, M. Shao, H. An, Z. Wang, S. Xu, et al., Fast electrosynthesis of Fe-containing layered double hydroxide arrays toward highly efficient electrocatalytic oxidation reactions, *Chem. Sci.* **6**(11) 6624-6631 (2015). <https://doi.org/10.1039/C5SC02417J>
- [S35] Y. Ao, S. Chen, C. Wang, X. Lu, Palladium cobalt alloy encapsulated in carbon nanofibers as bifunctional electrocatalyst for high-efficiency overall hydrazine splitting, *J. Colloid Interface Sci.* **601** 495-504 (2021). <https://doi.org/10.1016/j.jcis.2021.05.119>
- [S36] Q. Sun, M. Zhou, Y. Shen, L. Wang, Y. Ma, et al., Hierarchical nanoporous Ni(Cu) alloy anchored on amorphous NiFeP as efficient bifunctional electrocatalysts for hydrogen evolution and hydrazine oxidation, *J. Catal.* **373** 180-189 (2019). <https://doi.org/10.1016/j.jcat.2019.03.039>
- [S37] B. Li, K. Wang, J. Ren, P. Qu, NiOOH@Cobalt copper carbonate hydroxide nanorods as bifunctional electrocatalysts for highly efficient water and hydrazine oxidation, *New J. Chem.* **46**(16) 7615-7625 (2022). <https://doi.org/10.1039/D2NJ00518B>
